# Supplementary material for: Do the ends justify the means? Impact of drought progression rate on stress response and recovery in Vitis vinifera
Source: PubMed Central journal article supplement (PMC9299143; doi:10.1111/ppl.13590), 2021-11-10
Supplement: PPL-174-0-s001.pdf [file PPL-174-0-s001.pdf]

Supporting Information

Fig.S1 Schematic representation of the adopted experimental design

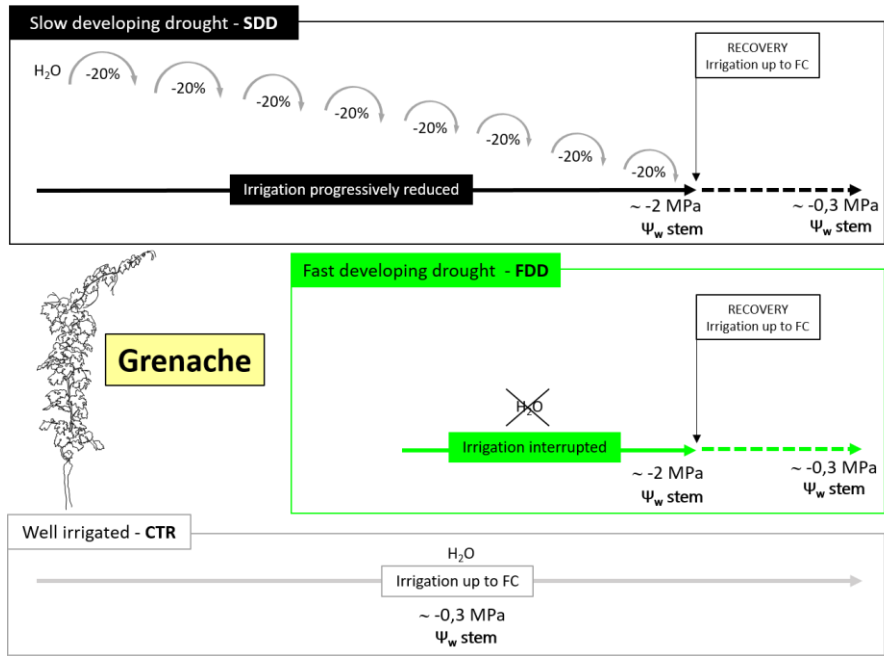

Fig.S2 Daily water loss through the imposed slow developing drought (SDD, black circles) and fast developing drought (FDD; green circles) in Grenache plants.

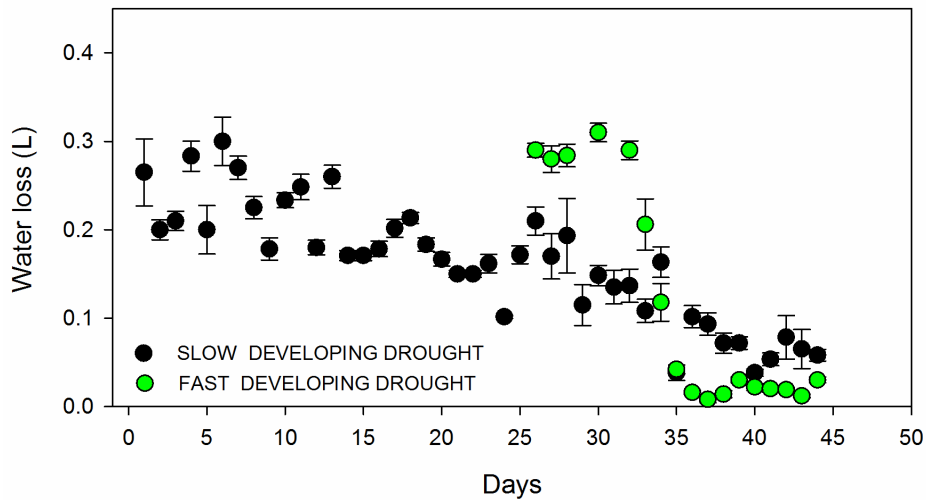

**Fig.S3** Net photosynthesis ( $A_n$ ) in relation to stomatal conductance ( $g_s$ ) during (a) slow and fast developing drought (SDD: black circles and FDD: green circles) followed by (b) recovery (REC) from slow and fast developing drought treatments. White circles represent well-irrigated plants (CTR).

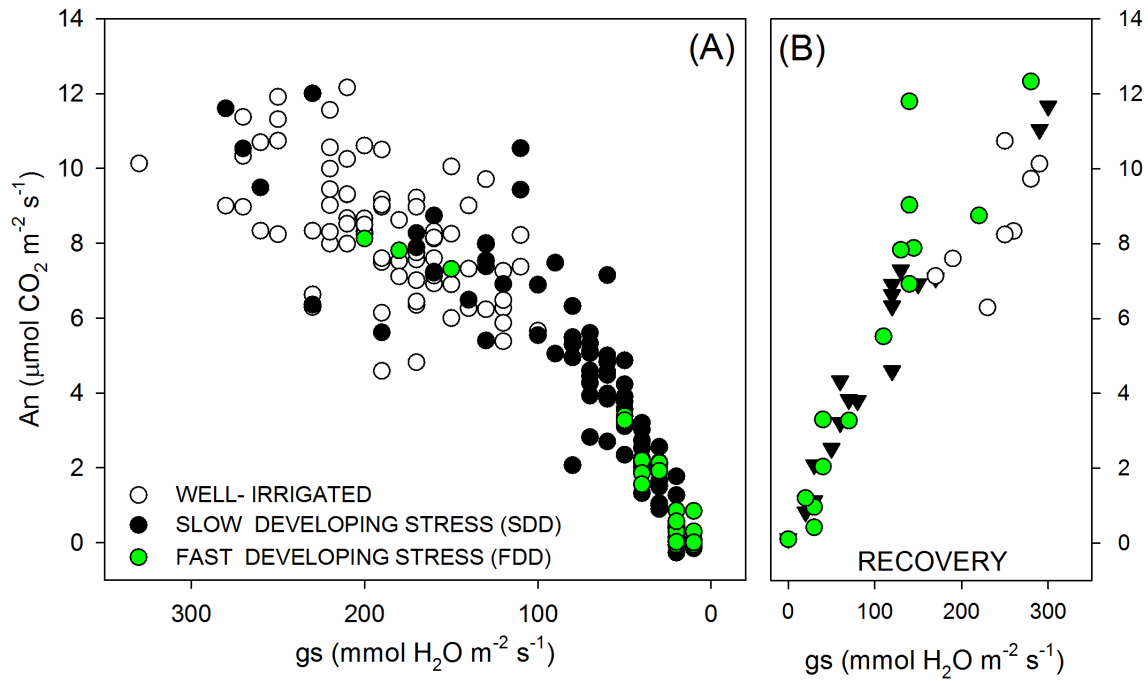

**Fig.S4** (a) Xylem pressure, (b) abscisic acid (ABA) concentration, (c) pH values and (d) soluble sugar content measured from xylem sap collected from plants exposed to a fast developing drought (FDD; green bars) and to a slow developing drought (SDD; black bars). One-way ANOVA tests suggest significant differences in both SDD and FDD stressed groups ( $P < 0.05$ ). Letters denote homogeneous groups based on the Fisher LSD method; data are mean values ( $n = 3$ ) and bars are SE.

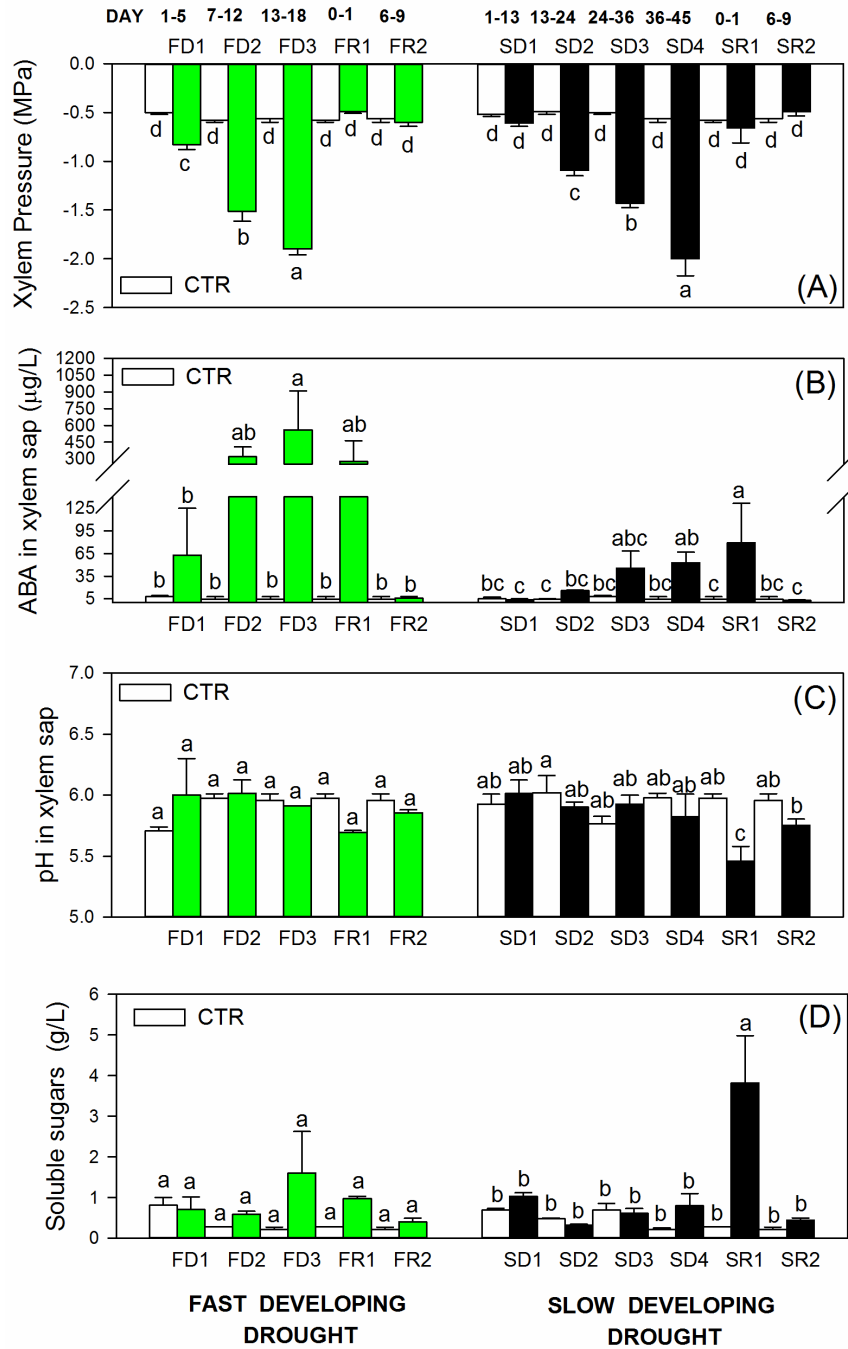

**Fig.S5** (a) Total carbohydrates (starch plus soluble sugars), (b) starch content and (c) soluble sugars content measured from stem tissues collected from plants exposed respectively to a fast developing drought (FDD; green bars) and to a slow developing drought (SDD; black bars). One-way ANOVA tests suggest significant differences in both SDD and FDD stressed groups ( $P < 0.05$ ). Letters denote homogeneous groups based on the Fisher LSD method; data are mean values ( $n = 3$ ) and bars are SE.

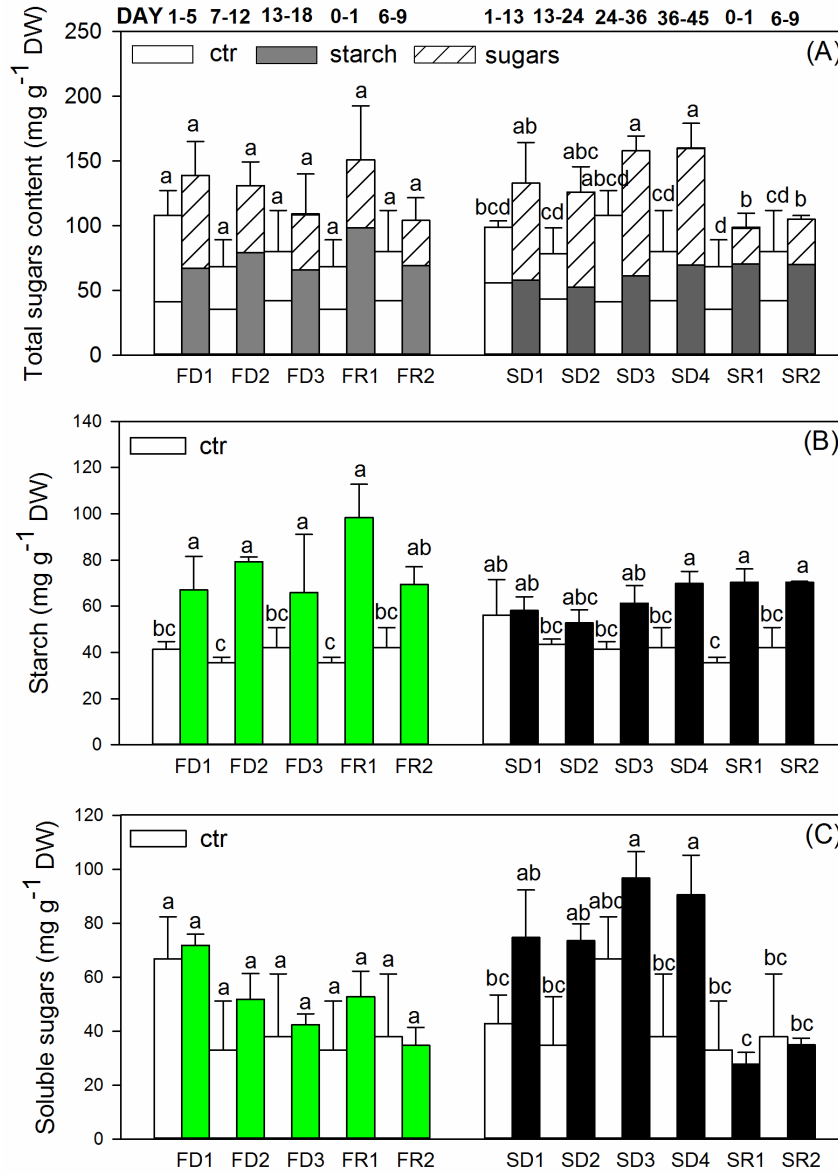

**Table S1** Daily average temperature and daily relative humidity recorded in the greenhouse during the experiment.

| Treatment | Day. | Daily T |      | T max |      | T min |      | Daily RH (%) |       | RH max |       | RH min(%) |       |
|-----------|------|---------|------|-------|------|-------|------|--------------|-------|--------|-------|-----------|-------|
|           |      | (°C)    | sd   | (°C)  | sd   | (°C)  | sd   |              | sd    | (%)    | sd    | min(%)    | sd    |
| stress    | 1    | 26,08   | 5,82 | 26,94 | 6,13 | 25,28 | 5,30 | 48,46        | 12,85 | 51,41  | 11,24 | 45,66     | 13,50 |
| stress    | 2    | 26,53   | 6,50 | 27,29 | 6,83 | 25,69 | 6,21 | 53,01        | 17,97 | 56,33  | 17,07 | 50,43     | 18,52 |
| stress    | 3    | 26,99   | 6,00 | 27,82 | 6,29 | 26,19 | 5,55 | 41,12        | 10,15 | 43,74  | 9,32  | 39,04     | 10,73 |
| stress    | 4    | 28,08   | 6,80 | 29,09 | 7,12 | 27,15 | 6,35 | 44,27        | 14,06 | 46,97  | 13,17 | 41,12     | 14,24 |
| stress    | 5    | 29,01   | 7,65 | 30,00 | 8,02 | 28,02 | 7,25 | 48,51        | 16,77 | 51,61  | 15,77 | 45,35     | 17,01 |
| stress    | 6    | 28,56   | 5,86 | 29,42 | 6,27 | 27,78 | 5,51 | 57,66        | 11,95 | 60,81  | 12,06 | 54,97     | 12,26 |
| stress    | 7    | 27,73   | 4,32 | 28,58 | 4,81 | 27,08 | 3,88 | 56,28        | 8,83  | 58,98  | 7,52  | 52,84     | 9,17  |
| stress    | 8    | 27,17   | 6,49 | 28,13 | 6,81 | 26,31 | 6,13 | 67,79        | 20,32 | 71,43  | 19,08 | 63,54     | 21,46 |
| stress    | 9    | 27,73   | 6,70 | 28,76 | 6,93 | 26,88 | 6,36 | 64,53        | 19,61 | 68,33  | 18,24 | 60,39     | 20,68 |
| stress    | 10   | 25,28   | 4,66 | 26,37 | 5,28 | 24,27 | 3,97 | 74,52        | 18,72 | 79,24  | 16,19 | 70,01     | 20,36 |
| stress    | 11   | 27,50   | 6,90 | 28,38 | 7,24 | 26,64 | 6,58 | 63,01        | 24,41 | 66,80  | 23,05 | 59,80     | 25,89 |
| stress    | 12   | 28,79   | 6,68 | 29,80 | 7,21 | 27,81 | 6,17 | 48,11        | 14,84 | 52,55  | 14,98 | 44,53     | 14,69 |
| stress    | 13   | 28,57   | 6,43 | 29,56 | 6,78 | 27,67 | 5,97 | 51,64        | 14,80 | 54,67  | 13,33 | 48,69     | 14,74 |
| stress    | 14   | 27,64   | 5,17 | 28,46 | 5,59 | 26,91 | 4,76 | 58,93        | 12,90 | 61,52  | 11,69 | 56,03     | 13,62 |
| stress    | 15   | 28,11   | 5,08 | 28,92 | 5,44 | 27,35 | 4,60 | 62,74        | 14,89 | 65,77  | 13,34 | 59,46     | 15,77 |
| stress    | 16   | 25,99   | 4,25 | 26,87 | 4,76 | 25,34 | 3,87 | 66,81        | 14,80 | 69,72  | 13,51 | 63,80     | 15,71 |
| stress    | 17   | 24,90   | 4,19 | 25,73 | 4,63 | 24,27 | 3,69 | 75,33        | 17,43 | 78,64  | 14,71 | 71,81     | 18,13 |
| stress    | 18   | 26,67   | 6,28 | 27,52 | 6,80 | 25,79 | 5,80 | 70,57        | 22,73 | 76,65  | 20,49 | 67,89     | 24,34 |
| stress    | 19   | 26,01   | 4,69 | 26,88 | 5,27 | 25,24 | 4,05 | 72,55        | 13,70 | 75,42  | 11,61 | 68,45     | 15,11 |
| stress    | 20   | 26,54   | 6,24 | 27,46 | 6,69 | 25,57 | 5,55 | 72,35        | 19,95 | 76,02  | 18,21 | 68,81     | 21,20 |
| stress    | 21   | 22,58   | 2,77 | 23,10 | 2,82 | 22,17 | 2,54 | 78,67        | 13,90 | 81,67  | 11,83 | 74,98     | 14,37 |
| stress    | 22   | 26,14   | 7,76 | 27,07 | 8,28 | 25,19 | 7,37 | 66,49        | 28,78 | 70,50  | 27,42 | 63,26     | 31,03 |
| stress    | 23   | 28,11   | 7,28 | 29,13 | 7,79 | 27,20 | 6,91 | 55,45        | 21,22 | 58,93  | 20,03 | 52,43     | 21,60 |
| stress    | 24   | 28,92   | 6,63 | 29,86 | 7,00 | 28,05 | 6,28 | 55,93        | 15,62 | 59,02  | 14,44 | 52,35     | 16,45 |
| stress    | 25   | 27,64   | 5,53 | 28,75 | 5,89 | 26,83 | 5,01 | 64,14        | 14,46 | 67,92  | 12,09 | 60,17     | 14,21 |
| stress    | 26   | 23,88   | 4,63 | 24,77 | 5,43 | 23,15 | 3,94 | 77,99        | 17,49 | 81,23  | 15,76 | 74,02     | 19,33 |
| stress    | 27   | 26,07   | 6,57 | 26,93 | 7,00 | 25,23 | 6,17 | 65,31        | 23,71 | 69,43  | 22,09 | 62,78     | 25,42 |
| stress    | 28   | 27,56   | 6,87 | 28,50 | 7,30 | 26,70 | 6,55 | 54,17        | 19,44 | 57,51  | 19,02 | 51,26     | 19,78 |
| stress    | 29   | 28,30   | 5,67 | 29,19 | 6,22 | 27,45 | 5,11 | 56,04        | 12,17 | 58,57  | 11,77 | 52,58     | 12,45 |
| stress    | 30   | 29,58   | 6,44 | 30,50 | 6,80 | 28,77 | 6,06 | 51,43        | 15,68 | 54,16  | 15,53 | 48,94     | 15,80 |
| stress    | 31   | 28,02   | 7,44 | 29,09 | 7,83 | 27,11 | 6,92 | 57,65        | 22,76 | 60,10  | 22,22 | 53,58     | 22,06 |
| stress    | 32   | 27,78   | 5,92 | 28,49 | 6,32 | 26,98 | 5,54 | 69,18        | 21,48 | 72,51  | 20,85 | 66,53     | 22,33 |
| stress    | 33   | 25,74   | 3,84 | 26,62 | 4,24 | 25,00 | 3,18 | 78,86        | 15,42 | 82,03  | 13,13 | 75,35     | 16,20 |
| stress    | 34   | 27,05   | 5,76 | 27,74 | 6,19 | 26,21 | 5,26 | 74,60        | 21,25 | 77,87  | 19,85 | 72,24     | 22,80 |
| stress    | 35   | 29,44   | 6,74 | 30,34 | 7,14 | 28,54 | 6,34 | 63,46        | 18,32 | 66,22  | 17,59 | 60,61     | 18,61 |
| stress    | 36   | 30,13   | 6,25 | 30,97 | 6,64 | 29,23 | 5,82 | 59,01        | 18,84 | 62,57  | 17,76 | 56,54     | 19,84 |
| stress    | 37   | 28,87   | 5,01 | 29,72 | 5,39 | 28,13 | 4,42 | 59,42        | 11,02 | 62,59  | 10,04 | 56,39     | 11,63 |
| stress    | 38   | 30,00   | 7,27 | 30,96 | 7,68 | 28,98 | 6,77 | 52,72        | 15,27 | 55,35  | 14,42 | 49,40     | 15,18 |
| stress    | 39   | 29,27   | 5,19 | 30,31 | 5,87 | 28,37 | 4,54 | 64,11        | 14,36 | 66,60  | 13,13 | 61,21     | 15,54 |
| stress    | 40   | 30,36   | 5,91 | 31,23 | 6,33 | 29,46 | 5,37 | 61,98        | 19,00 | 65,66  | 18,68 | 59,15     | 19,12 |
| stress    | 41   | 30,45   | 5,86 | 31,29 | 6,24 | 29,65 | 5,37 | 54,85        | 14,04 | 57,65  | 13,84 | 52,62     | 14,23 |
| stress    | 42   | 29,66   | 6,04 | 30,57 | 6,46 | 28,74 | 5,41 | 50,93        | 10,12 | 53,99  | 9,30  | 48,64     | 10,45 |
| stress    | 43   | 28,44   | 5,94 | 29,39 | 6,24 | 27,62 | 5,47 | 60,27        | 16,39 | 63,17  | 16,30 | 56,60     | 16,17 |
| stress    | 44   | 27,41   | 5,97 | 28,35 | 6,56 | 26,59 | 5,50 | 61,47        | 17,79 | 64,42  | 16,90 | 58,42     | 18,34 |
| recovery  | 1    | 25,77   | 4,81 | 26,48 | 5,17 | 25,08 | 4,28 | 64,62        | 14,84 | 67,58  | 13,61 | 61,41     | 14,97 |
| recovery  | 2    | 27,65   | 6,59 | 28,48 | 7,03 | 26,72 | 6,08 | 60,80        | 19,44 | 63,72  | 18,61 | 58,51     | 20,62 |
| recovery  | 3    | 28,26   | 6,05 | 29,26 | 6,63 | 27,36 | 5,52 | 56,67        | 17,38 | 59,49  | 16,46 | 54,06     | 18,07 |
| recovery  | 4    | 27,43   | 4,94 | 28,11 | 5,25 | 26,69 | 4,46 | 63,04        | 12,44 | 65,17  | 11,37 | 60,60     | 12,80 |
| recovery  | 5    | 25,02   | 3,01 | 25,63 | 3,21 | 24,46 | 2,41 | 75,27        | 12,21 | 77,80  | 10,16 | 72,13     | 12,86 |
| recovery  | 6    | 26,11   | 5,66 | 26,89 | 6,15 | 25,27 | 5,14 | 68,95        | 20,81 | 71,93  | 20,03 | 66,70     | 22,48 |
| recovery  | 7    | 26,84   | 5,38 | 27,68 | 5,92 | 25,95 | 4,58 | 62,02        | 16,03 | 65,01  | 14,68 | 59,22     | 16,75 |
| recovery  | 8    | 28,00   | 6,20 | 28,71 | 6,47 | 27,04 | 5,52 | 57,43        | 18,72 | 60,15  | 17,91 | 55,25     | 19,04 |
| recovery  | 9    | 27,22   | 4,85 | 28,15 | 5,32 | 26,45 | 4,23 | 59,76        | 13,58 | 62,82  | 13,28 | 55,86     | 13,15 |
| recovery  | 10   | 27,84   | 6,27 | 28,56 | 6,56 | 26,77 | 5,42 | 60,55        | 18,05 | 63,88  | 17,03 | 57,83     | 18,40 |
